# Supplementary material for: Glycosylphosphatidylinositol biosynthesis and remodeling are required for neural tube closure, heart development, and cranial neural crest cell survival
Source: eLife journal article supplement (doi:10.7554/elife.45248), 2019-06-24
Supplement: supp [file elife-45248-supp-v1.zip]

Archive with 16 entries (16 files):
- elife_poa_e45248_Figure_6_source_data_1.xlsx
- elife_poa_e45248_Figure_2_figure_supplement_1.tif
- elife_poa_e45248_Figure_8_source_data_1.xlsx
- elife_poa_e45248_Figure_7_figure_supplement_1.tif
- elife_poa_e45248_Supplementary_file_1.pptx
- elife_poa_e45248_Supplementary_file_3.tif
- elife_poa_e45248_Figure_4_source_data_1.xlsx
- elife_poa_e45248_Figure_5_source_data_1.xlsx
- elife_poa_e45248_Figure_4_figure_supplement_1.tif
- elife_poa_e45248_Transparent_Reporting_File.docx
- elife_poa_e45248_Figure_3_figure_supplement_1.tif
- elife_poa_e45248_Figure_8_figure_supplement_1.tif
- elife_poa_e45248_Transparent_Reporting_File.pdf
- elife_poa_e45248_Figure_1_source_data_1.xlsx
- elife_poa_e45248_Figure_6_figure_supplement_1.tif
- elife_poa_e45248_Supplementary_file_2.pptx
