# Supplementary material for: Glycosylphosphatidylinositol biosynthesis and remodeling are required for neural tube closure, heart development, and cranial neural crest cell survival
Source: eLife journal article supplement (doi:10.7554/elife.45248), 2019-06-24
Supplement: supp [file elife-45248-supp-v1.zip › elife_poa_e45248_Figure_1_source_data_1.xlsx]

## Sheet: Sheet1
Radius length (mm)/crown to rump length (mm)			Humerus Length (mm)/crown to rump length (mm)
WT	Clpex		WT	Clpex
0.145778	0.128428		0.158311	0.143144
0.157539	0.130518		0.167681	0.145234
0.164384	0.146376		0.178803	0.161154
0.140293	0.128544		0.15492	0.16005
0.140882	0.139303		0.155365	0.152985
0.149394	0.11858		0.158816	0.128725
0.157036	0.124599		0.163834	0.136159
0.142953	0.124381		0.157114	0.142327
0.148223	0.113031		0.160966	0.136069
0.151762	0.122392		0.164634	0.133519
0.14952	0.123704		0.159122	0.143704
0.15541	0.118402		0.158689	0.142653
0.126609			0.142346
0.130894			0.14708
0.126462			0.143275
0.128151			0.148459
0.122682			0.142653
0.118254			0.138095
