# Supplementary material for: Glycosylphosphatidylinositol biosynthesis and remodeling are required for neural tube closure, heart development, and cranial neural crest cell survival
Source: eLife journal article supplement (doi:10.7554/elife.45248), 2019-06-24
Supplement: supp [file elife-45248-supp-v1.zip › elife_poa_e45248_Figure_4_source_data_1.xlsx]

## Sheet: Sheet1
MEF FLAER MFI
WT	MFI	Clpex mutant	MFI
Clpex.458.3 WT MEF experiment 1	12335	Clpex.458.1 Clpex Mut MEF experiment 1	6634
Clpex.458.4 WT MEF experiment 1	17404	Clpex.458.2 Mut MEF experiment 1	5965
Clpex.458.3 WT MEF experiment 2	8114	Clpex.458.2 Mut MEF experiment 2	4715
432.1 WT MEF experiment 1	7552	432.4 Mut MEF experiment 1	2366
432.2 WT MEF experiment 1	5259	432.3 MUT MEF experiment 1	2922
293T clones FLAER MFI
	WT MFI	Clpex KI Clone 1 MFI	Clpex KI Clone 4 MFI	Clpex KI Clone 7 MFI	PGAP2-/- MFI	PIGA-/- MFI
FLAER staining experiment 1	1505	805	1153	1417	672	238
FLAER staining experiment 2	2275	781	1482	1325	1280	591
FLAER staining experiment 3	2536	810	1513	1480	1162	680
FLAER staining experiment 4	3774	1232	1068	1405	1613	442
