# Supplementary material for: Glycosylphosphatidylinositol biosynthesis and remodeling are required for neural tube closure, heart development, and cranial neural crest cell survival
Source: eLife journal article supplement (doi:10.7554/elife.45248), 2019-06-24
Supplement: supp [file elife-45248-supp-v1.zip › elife_poa_e45248_Figure_5_source_data_1.xlsx]

## Sheet: Sheet1
	Pearson Coefficient WGA 561 channel colocalization with Folr1-myc 488
	WT	PIGA-/-	PGAP2 -/-
Pearson co-efficient/60x field	0.4808	0.0591	0.205
	0.4923	0.0428	0.2333
	0.4679	0.0341	0.2356
	0.644	0.0827	0.2194
	0.5303	0.0489	0.175
	0.5471	0.0993	0.2073
	0.4059	0.0489	0.2139
	0.4941	0.0692	0.2077
	0.4669		0.2123
	0.586		0.2635
	0.2662		0.1578
	0.3156		0.2028
	0.3378		0.2061
	0.424		0.2459
	0.4854		0.1965
