# Supplementary material for: Glycosylphosphatidylinositol biosynthesis and remodeling are required for neural tube closure, heart development, and cranial neural crest cell survival
Source: eLife journal article supplement (doi:10.7554/elife.45248), 2019-06-24
Supplement: supp [file elife-45248-supp-v1.zip › elife_poa_e45248_Figure_6_source_data_1.xlsx]

## Sheet: Sheet1
	%CC3+/%AP2+ spots in the first branchial arch
	WT	Clpex
CC3+ spots/AP2+ spots per 20x image ROI	3.71747	14.4745
	6.53266	43.5714
	3.89344	62.2865
	5.37115	46.9758
	5.58292	21.2299
	2.67857	17.8737
	8.81633	47.7273
	4.02756	41.5484
	10.3359	26.2889
		11.3684
		5.73192
		0.906149
		25.7102
		74.1176
		12.9223
		11.8632
		21.4664
		31.4858
		6.06061
		15.6721
		7.44681
		21.2411
