# Supplementary material for: Glycosylphosphatidylinositol biosynthesis and remodeling are required for neural tube closure, heart development, and cranial neural crest cell survival
Source: eLife journal article supplement (doi:10.7554/elife.45248), 2019-06-24
Supplement: supp [file elife-45248-supp-v1.zip › elife_poa_e45248_Figure_8_source_data_1.xlsx]

## Sheet: Sheet1
MPNMC FLAER MFI
WT	MFI	Hemizygous Piga cKO	MFI
Piga.7.5 WT	2584	Piga.7.4 Mut	412
Piga.7.7 WT	2085	Piga.7.5 Mut	378
Piga.28.3 WT	3701	Piga.28.5 Hemizygous KO	486
Piga.28.4 WT	3849
