# Supplementary figures and images for: Glycosylphosphatidylinositol biosynthesis and remodeling are required for neural tube closure, heart development, and cranial neural crest cell survival
Source: eLife journal article supplement (doi:10.7554/elife.45248), 2019-06-24

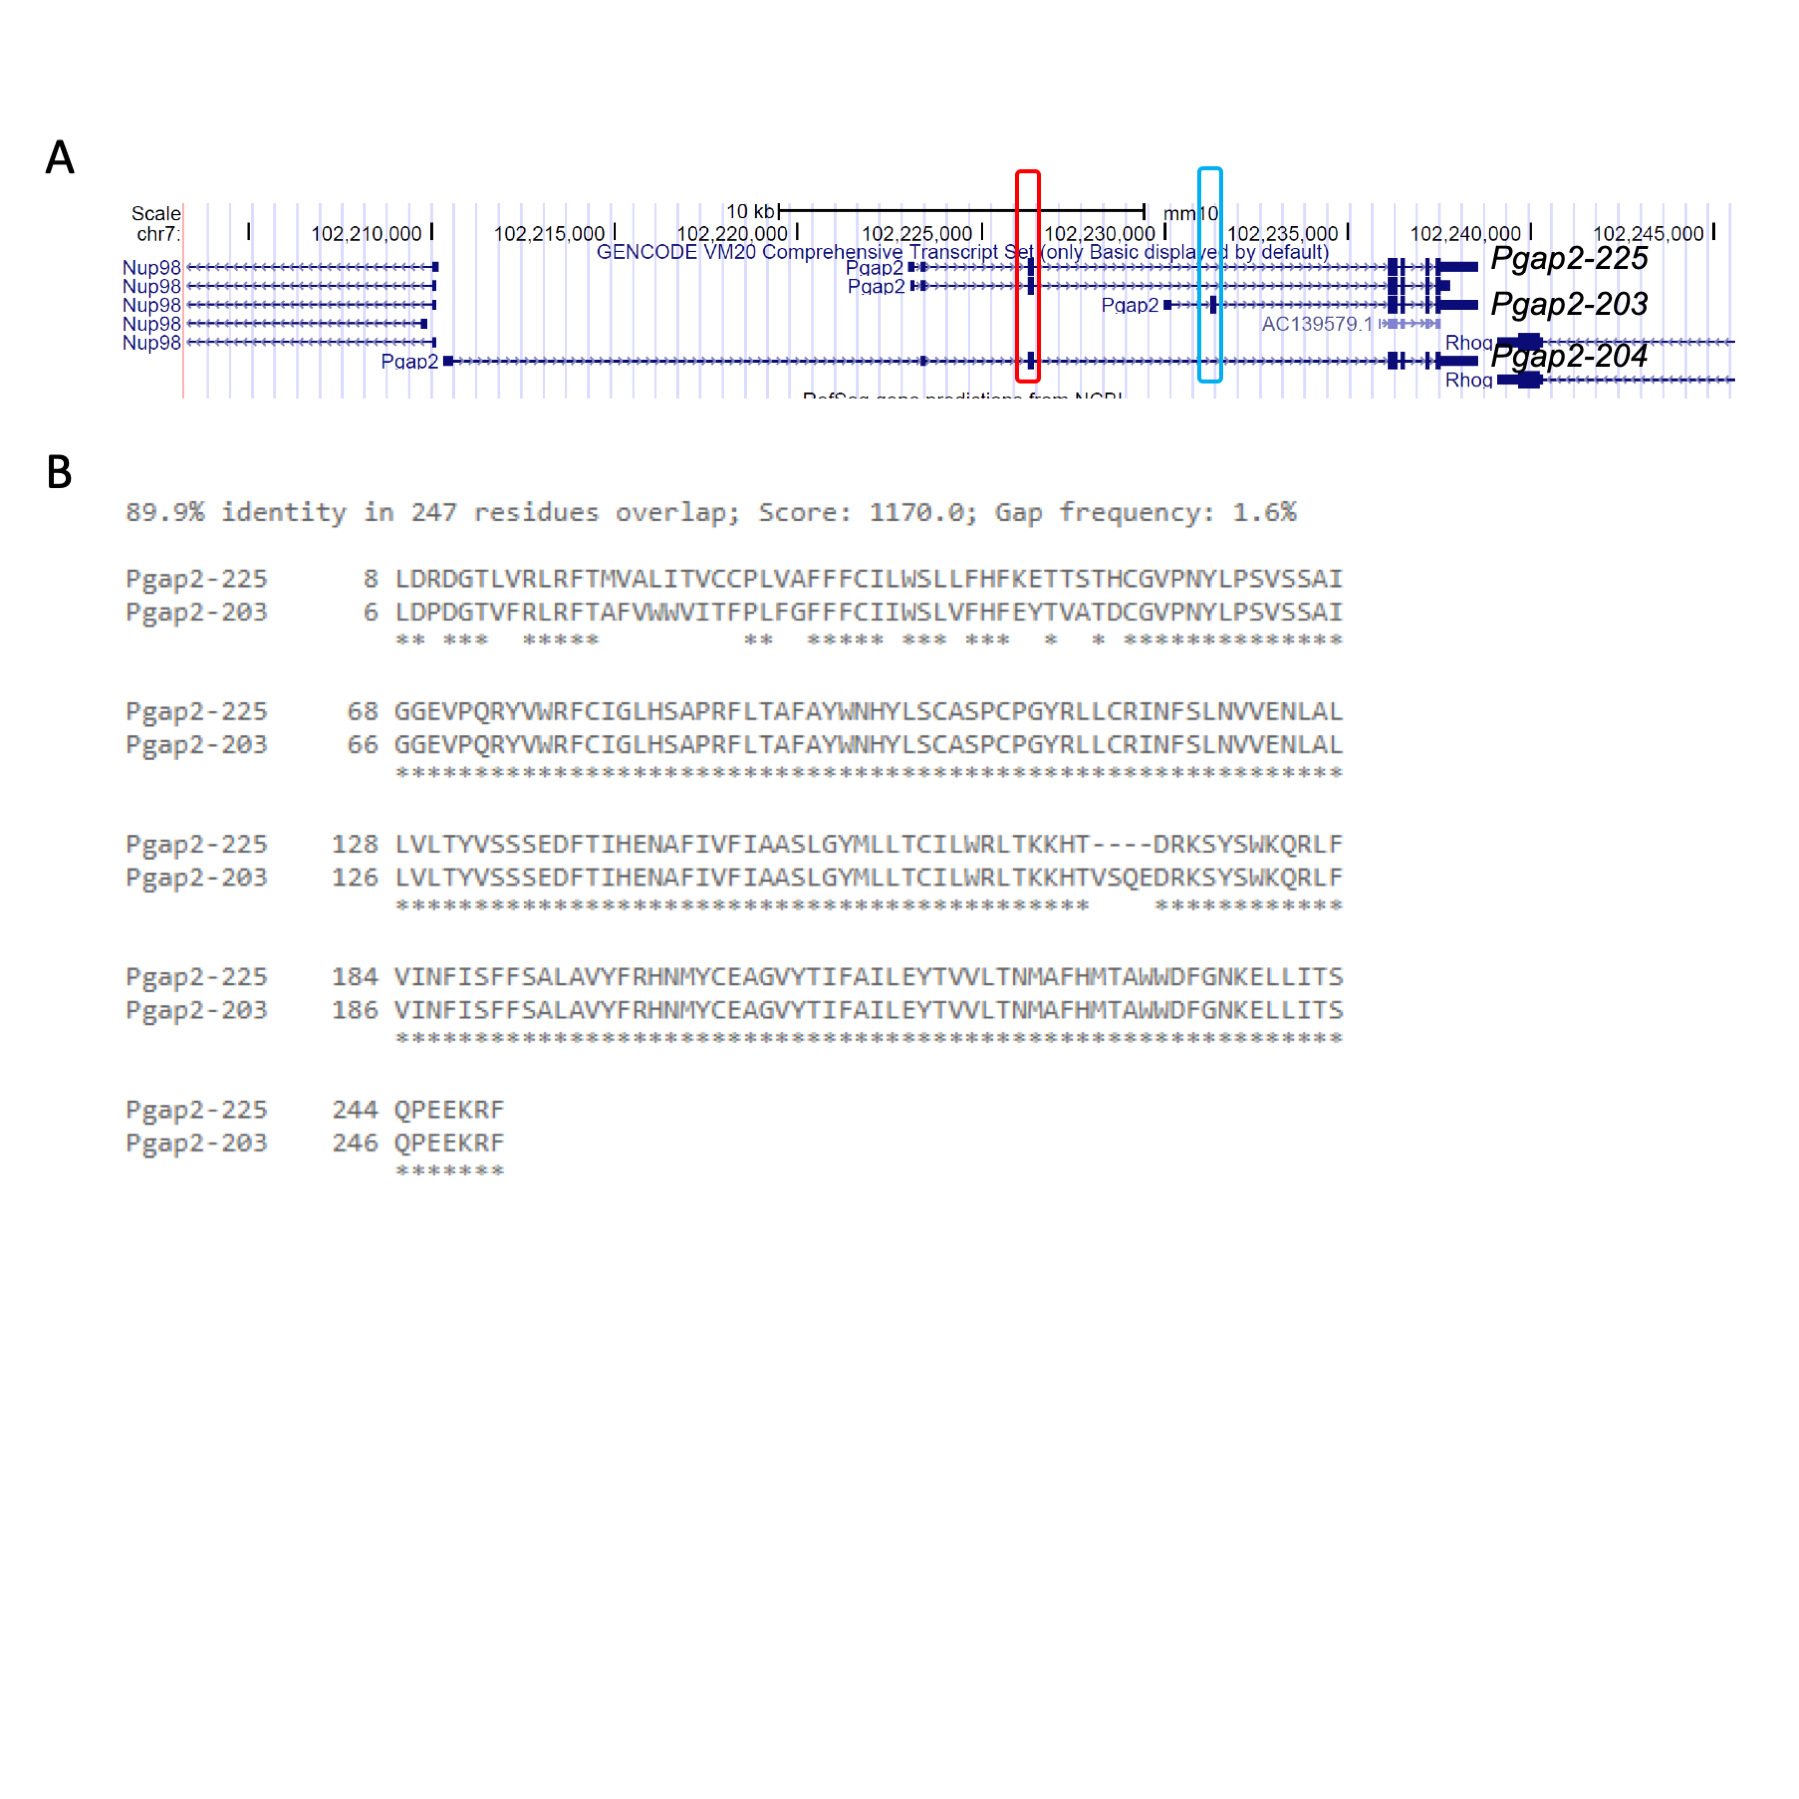

Supplement: supp [file elife-45248-supp-v1.zip › elife_poa_e45248_Figure_2_figure_supplement_1.tif]

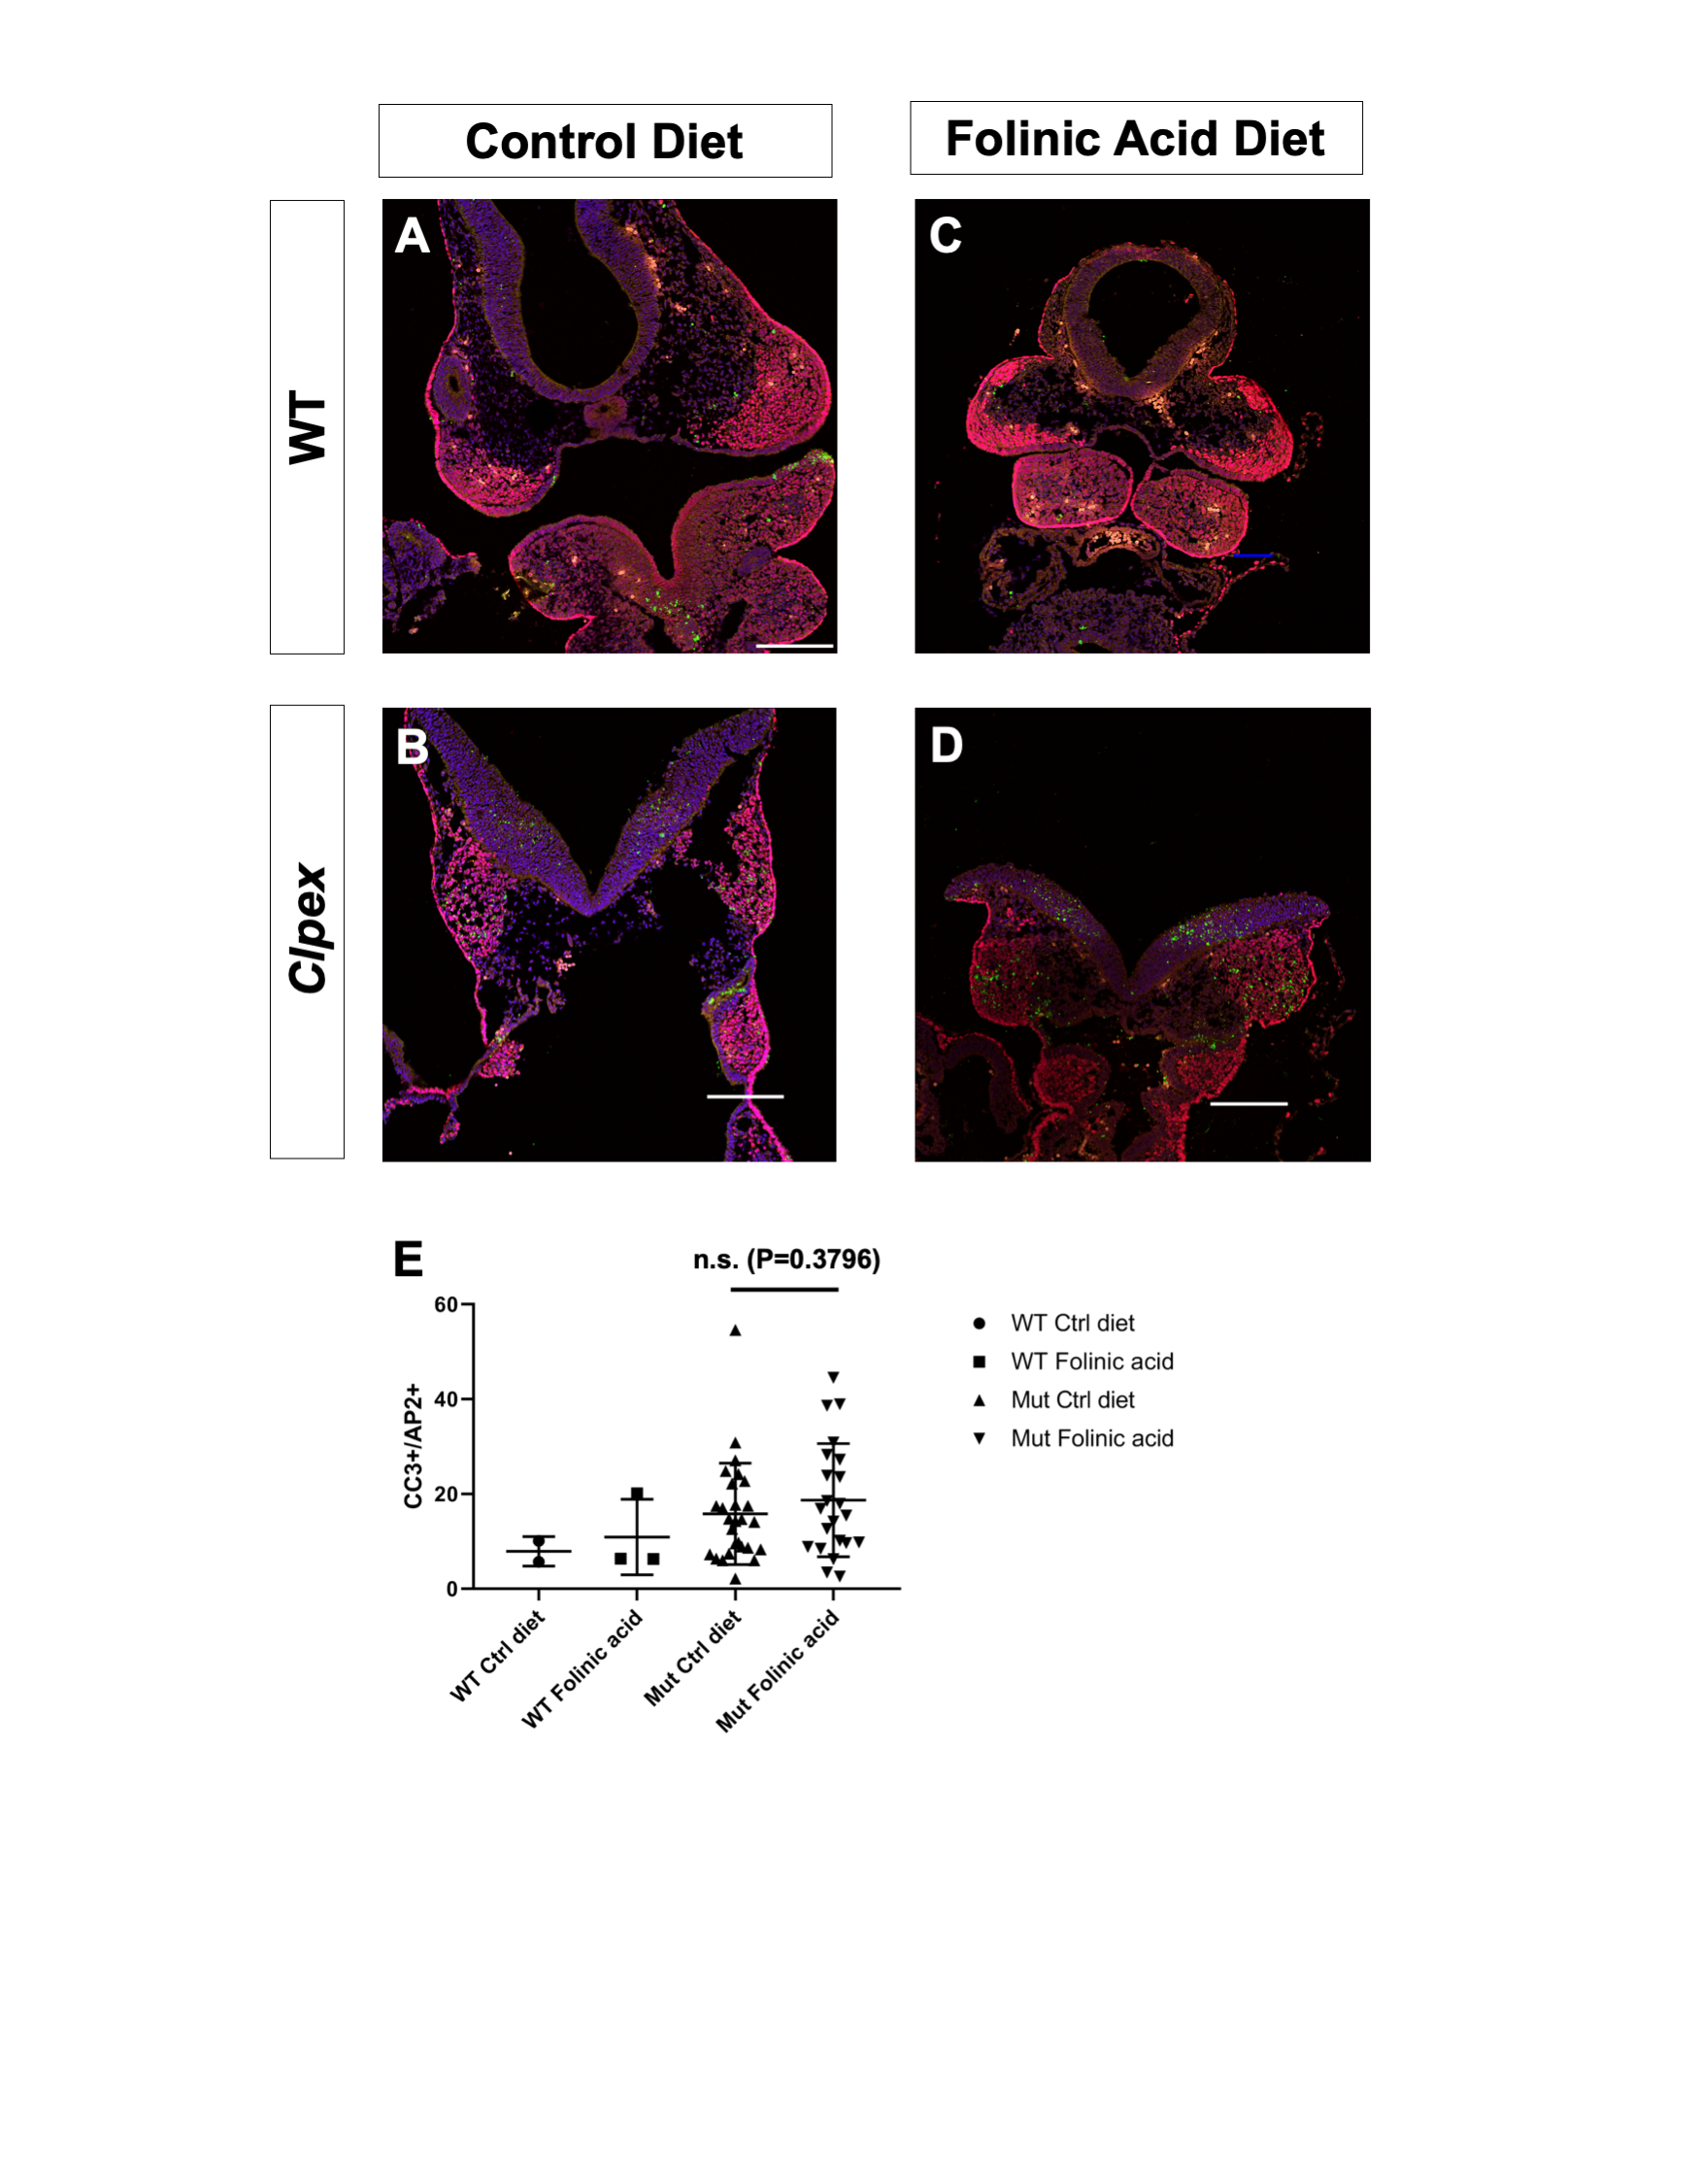

Supplement: supp [file elife-45248-supp-v1.zip › elife_poa_e45248_Figure_7_figure_supplement_1.tif]

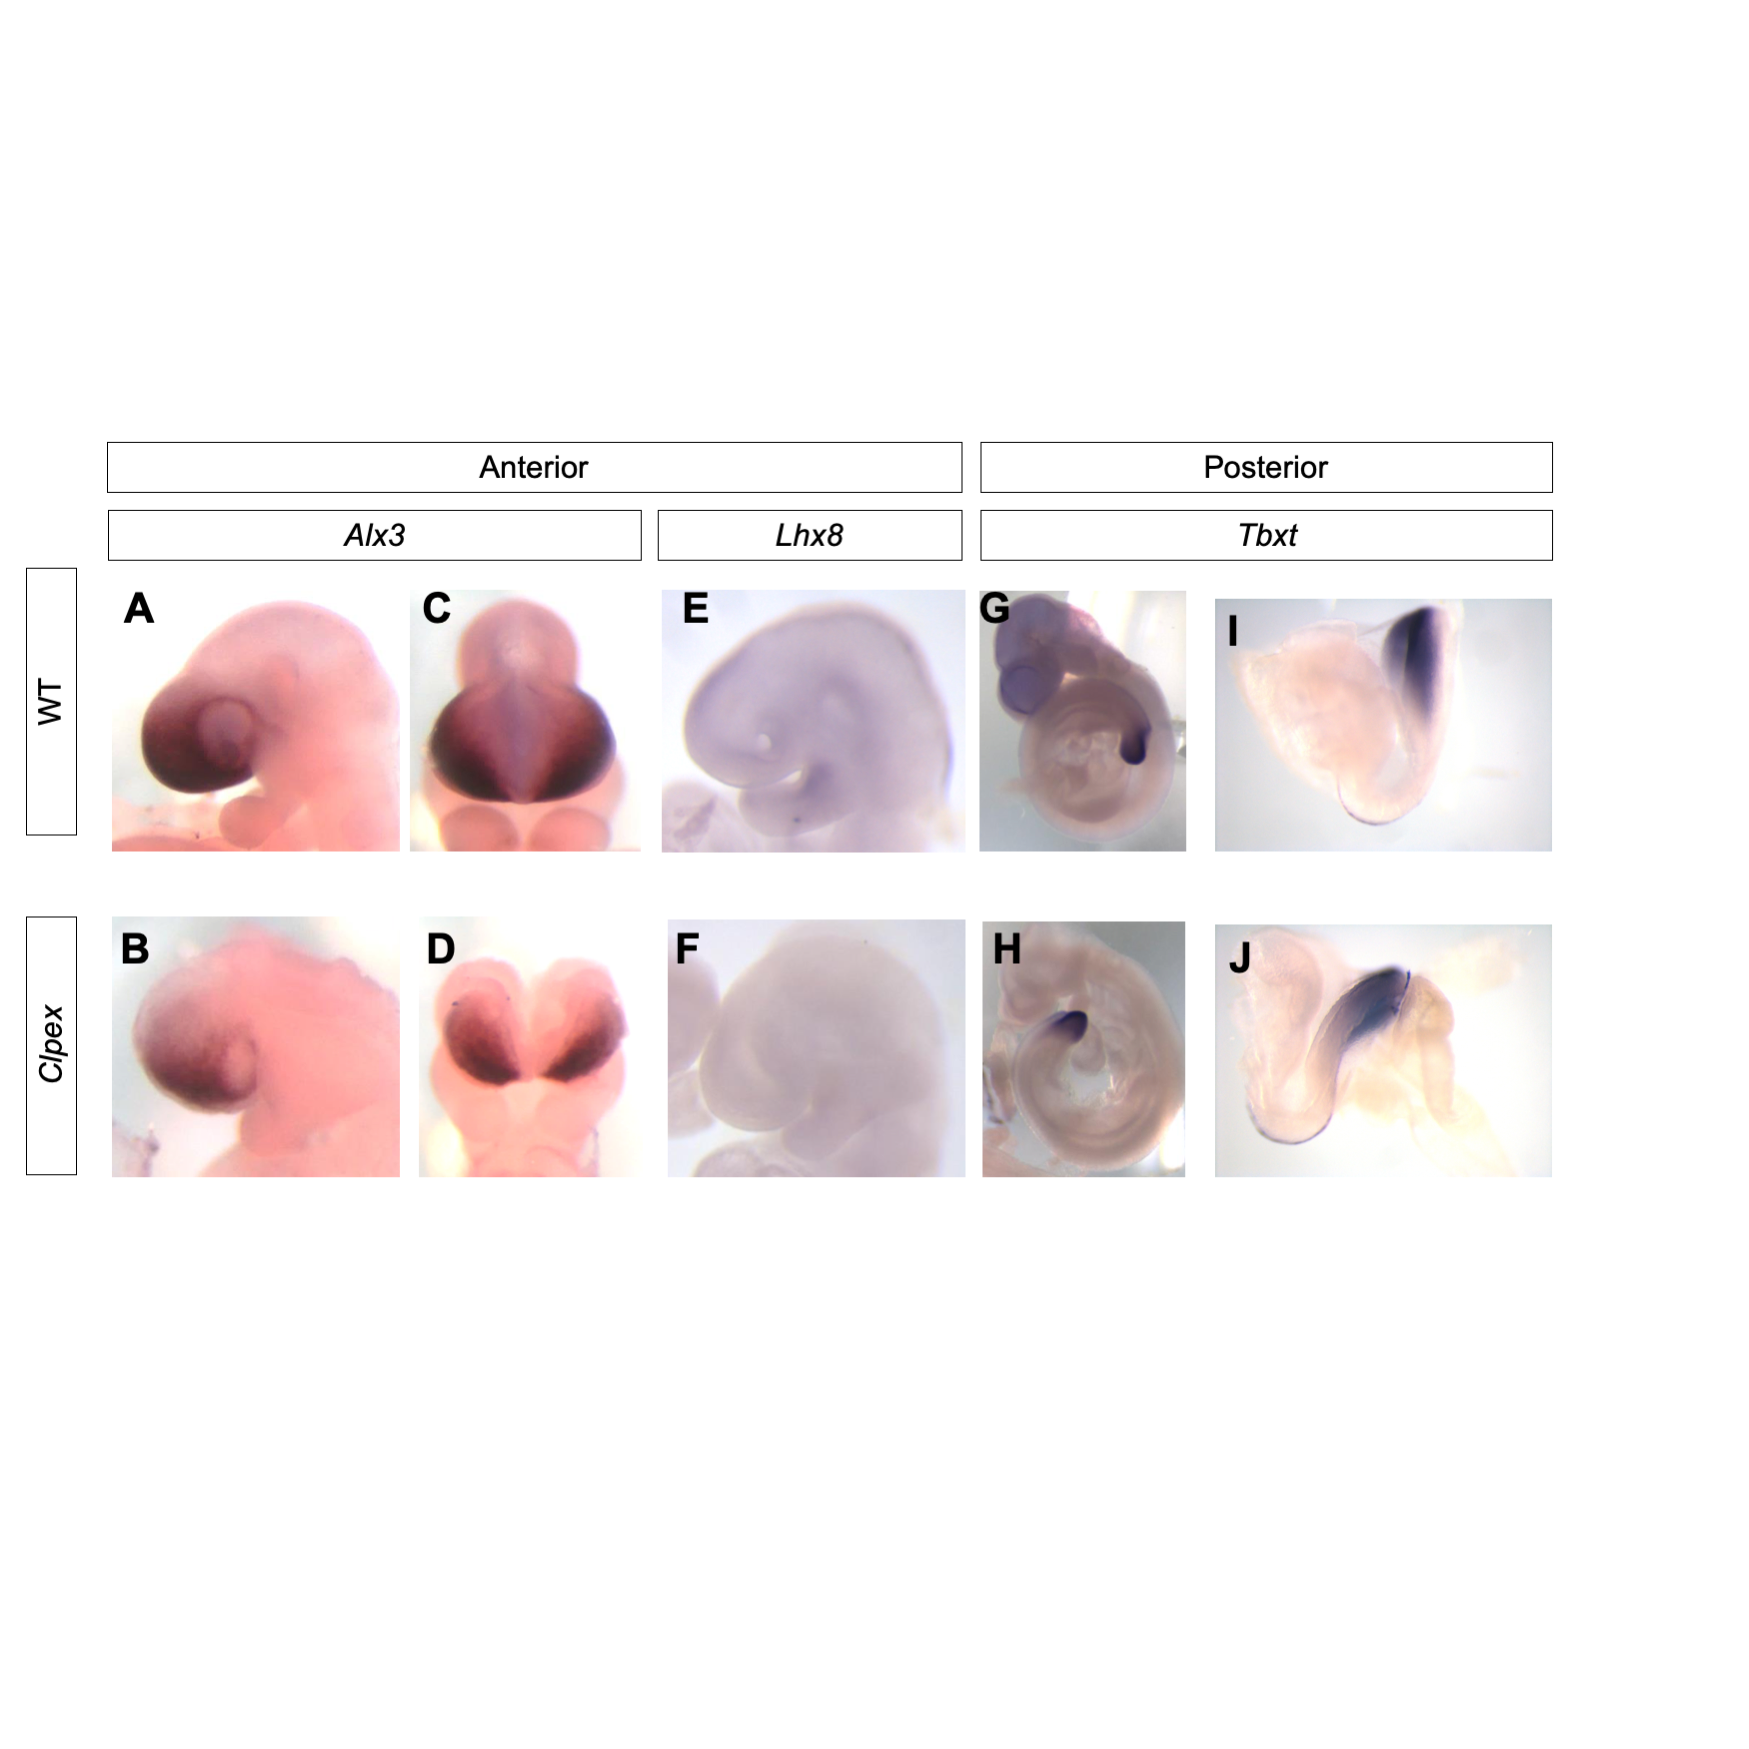

Supplement: supp [file elife-45248-supp-v1.zip › elife_poa_e45248_Supplementary_file_3.tif]

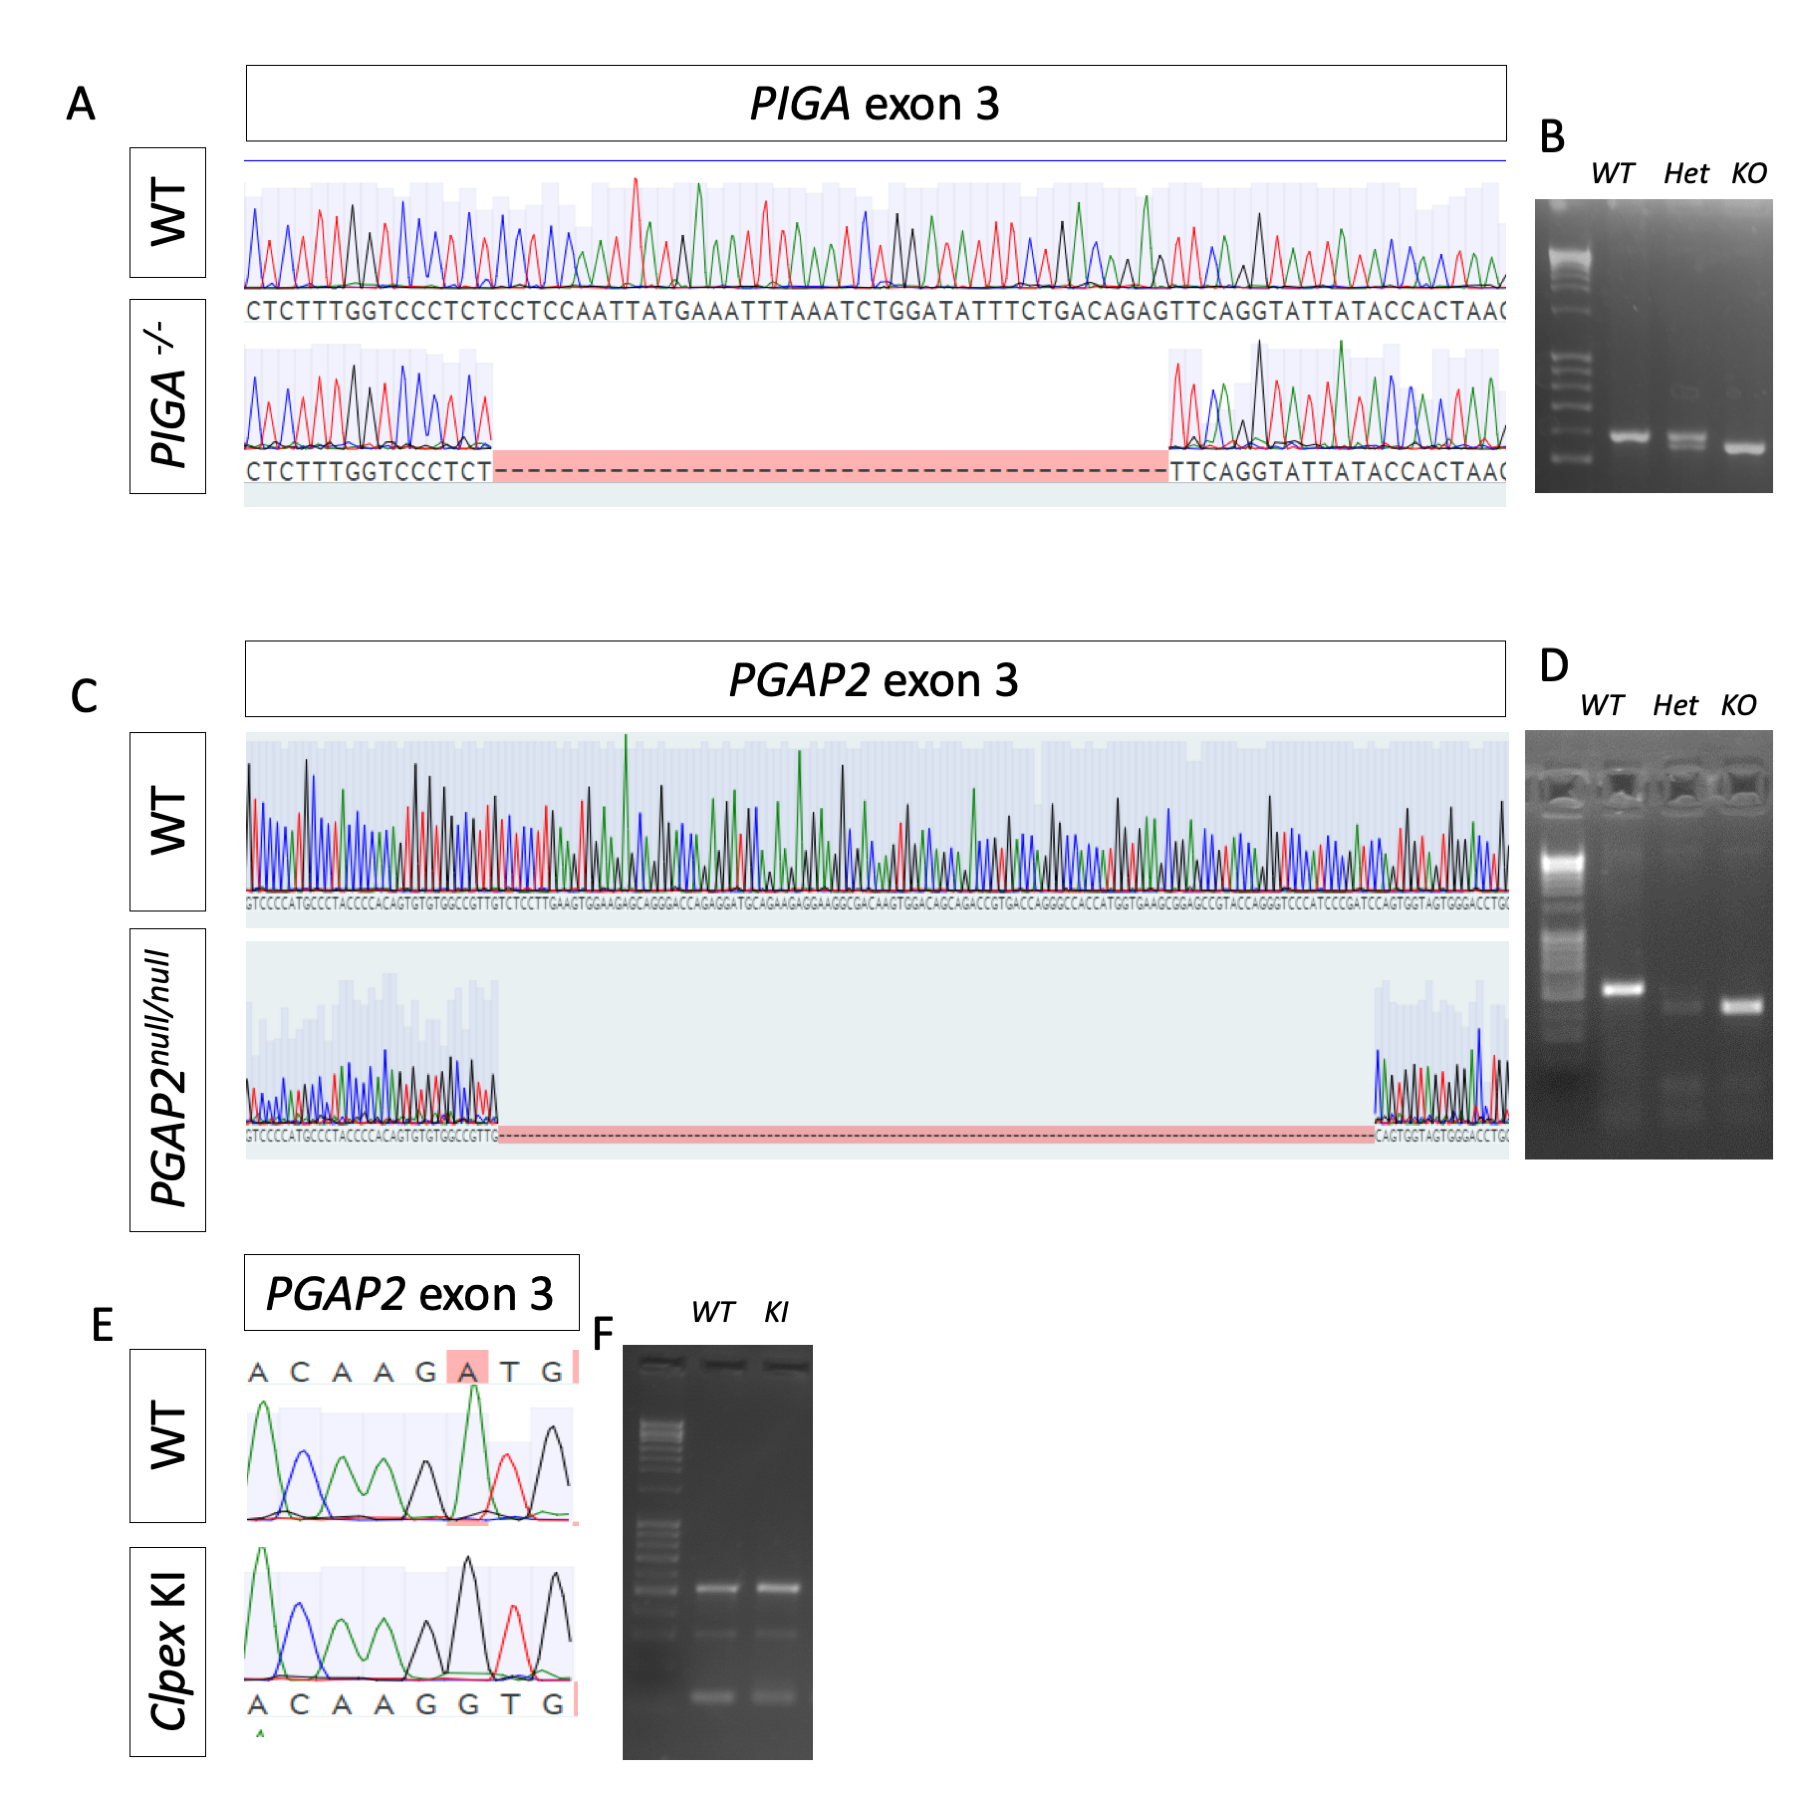

Supplement: supp [file elife-45248-supp-v1.zip › elife_poa_e45248_Figure_4_figure_supplement_1.tif]

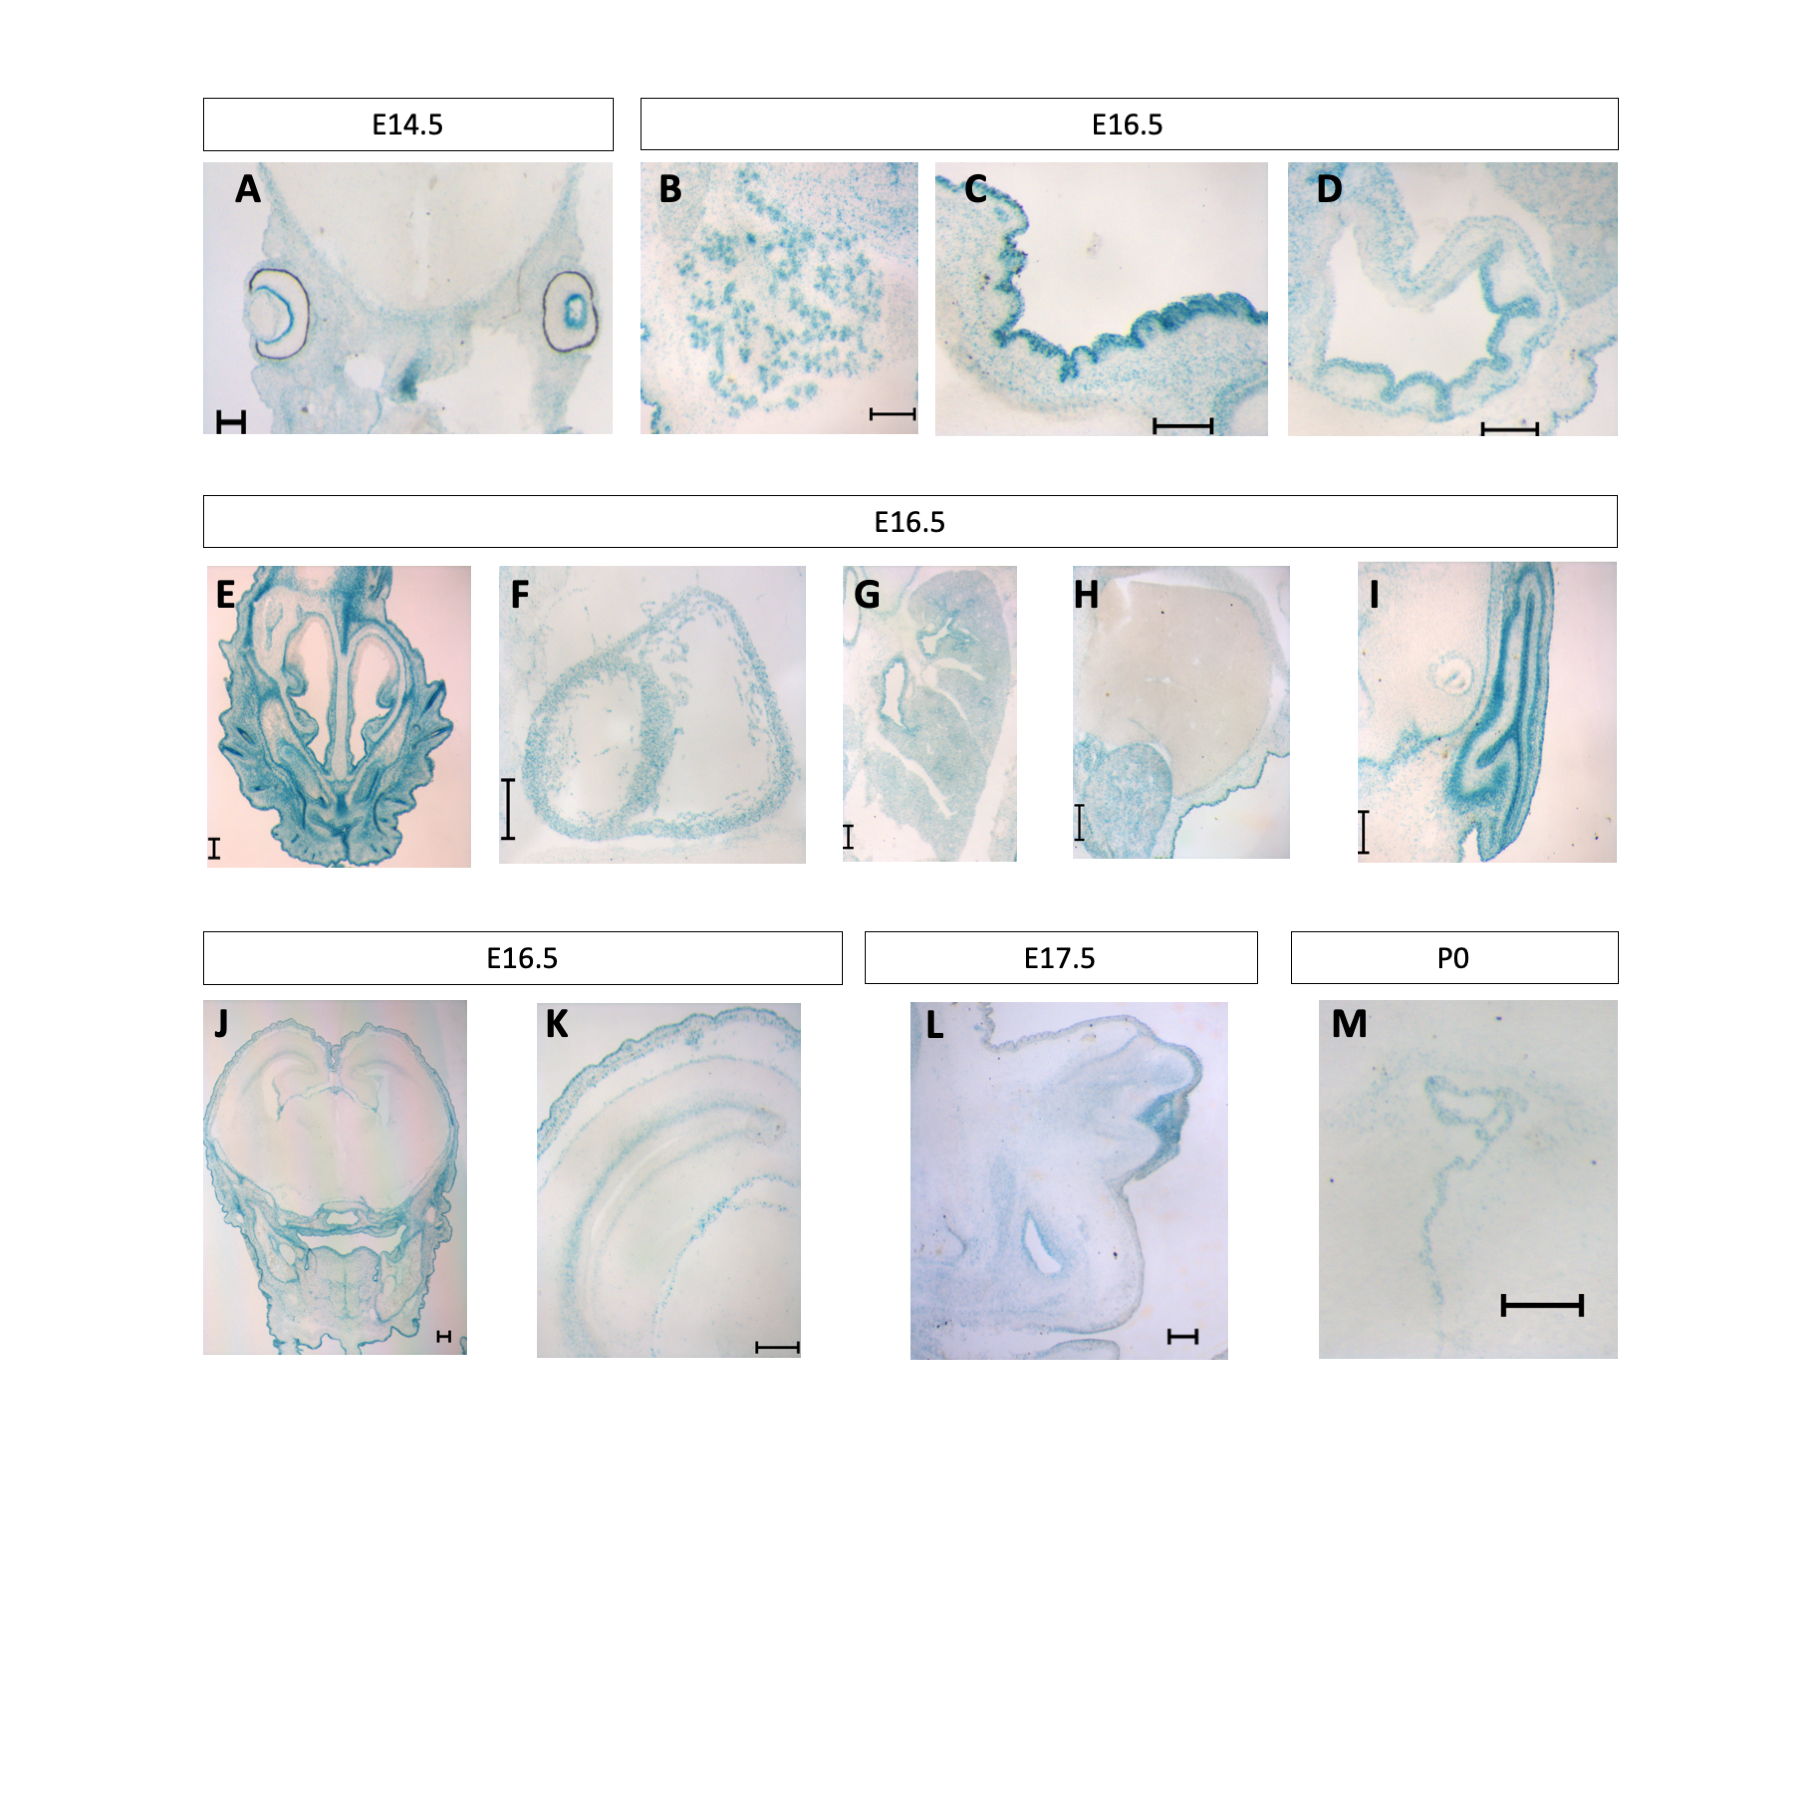

Supplement: supp [file elife-45248-supp-v1.zip › elife_poa_e45248_Figure_3_figure_supplement_1.tif]

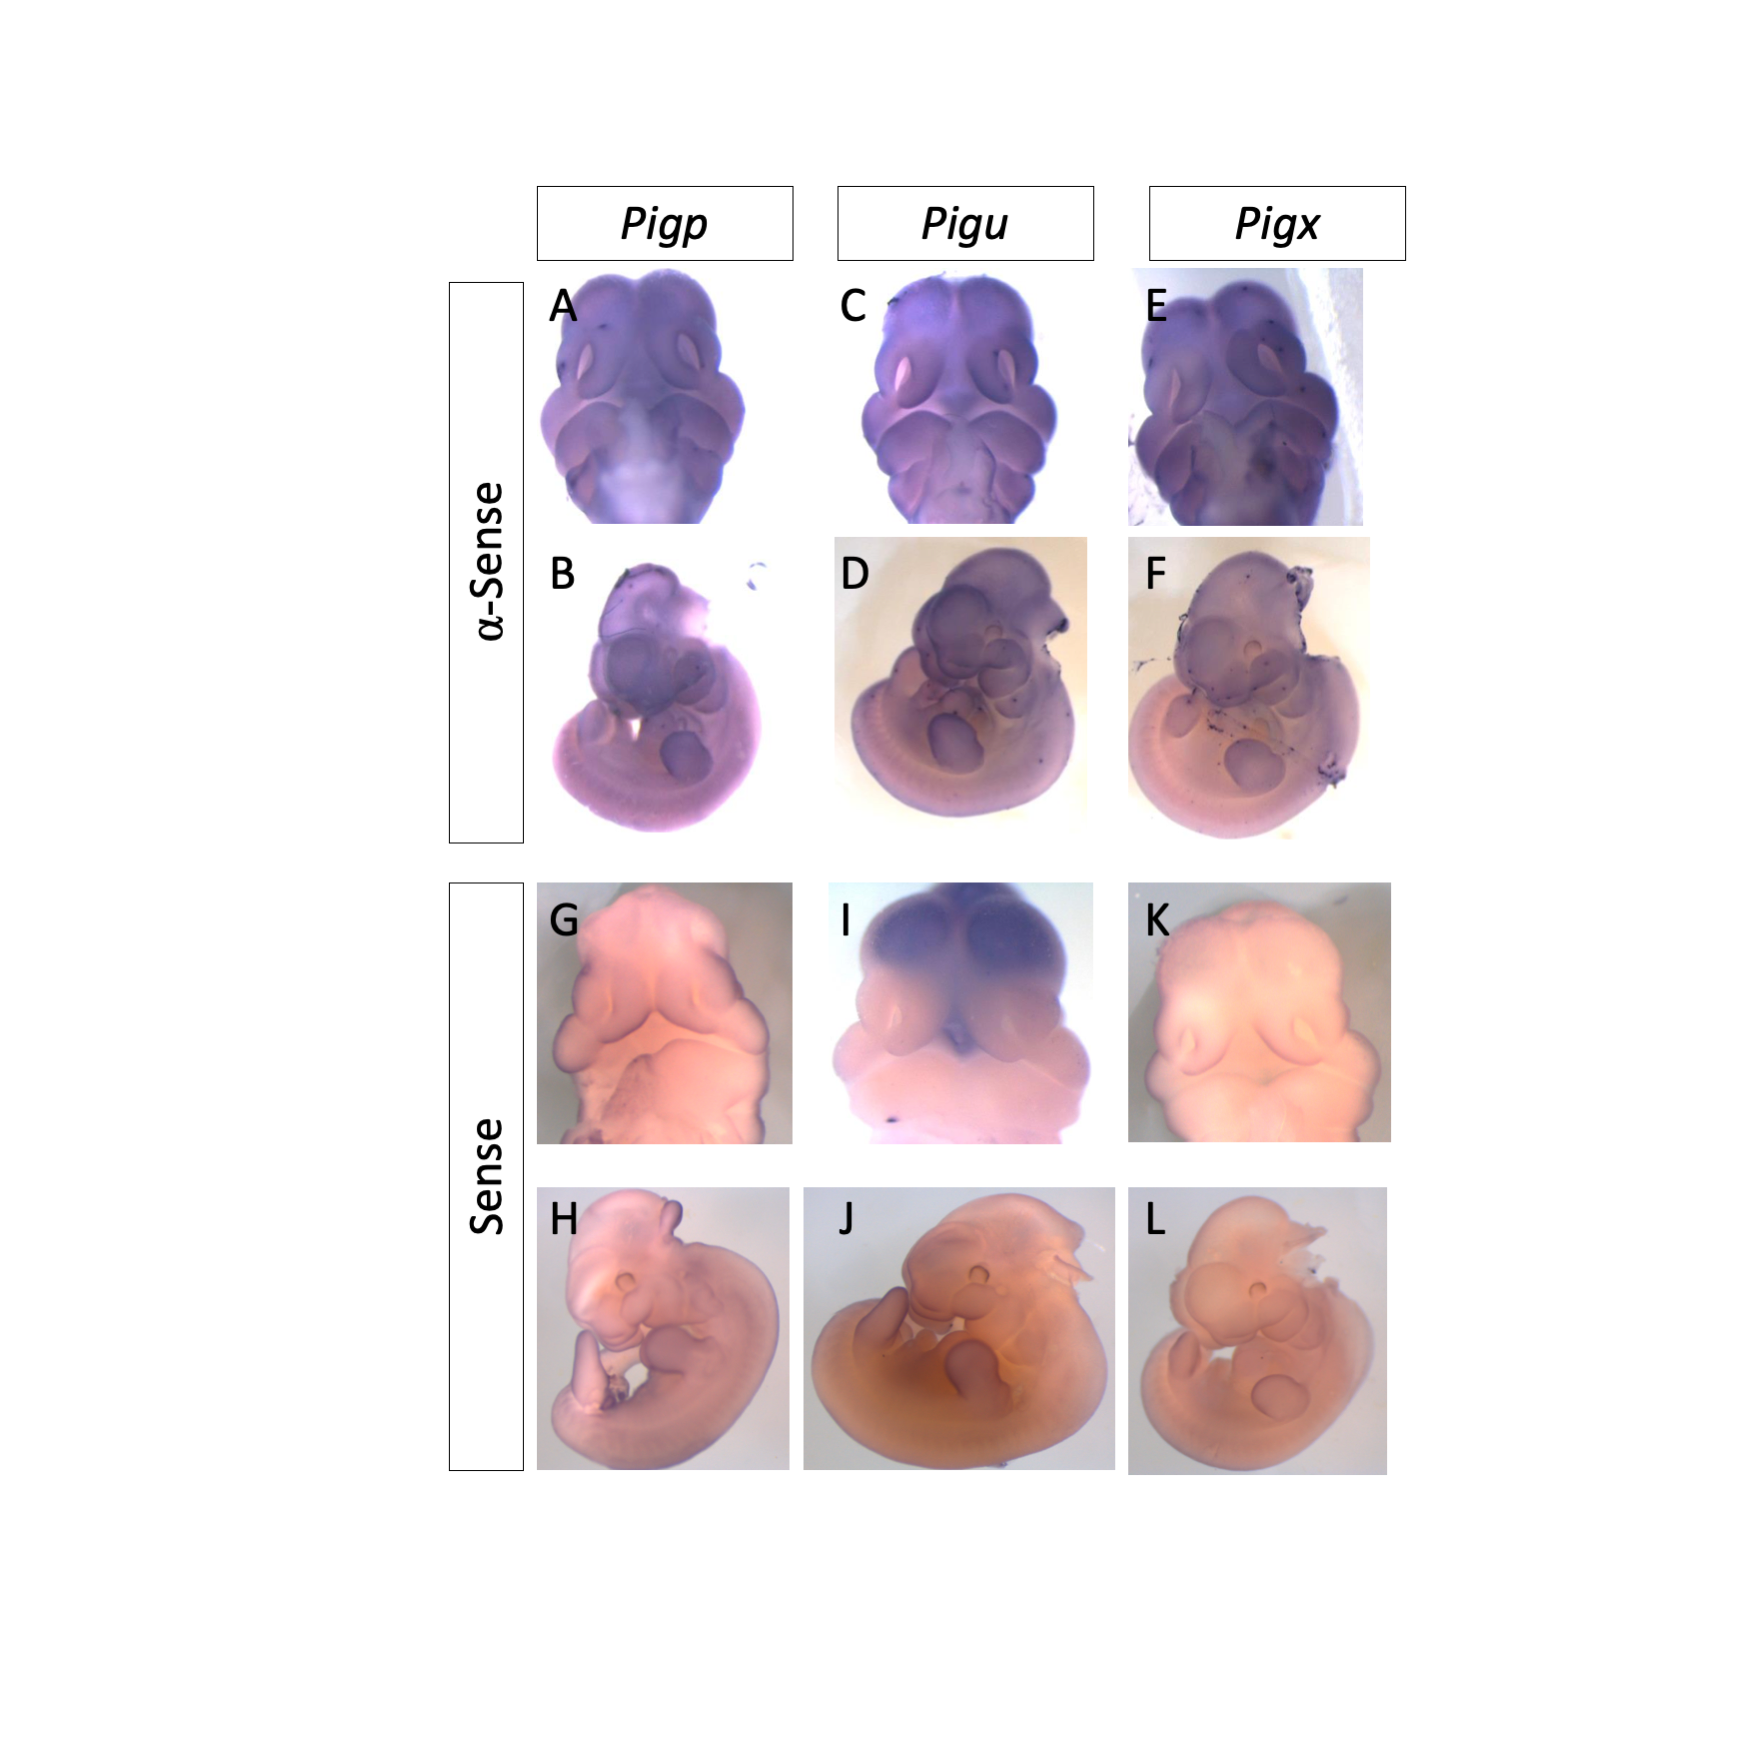

Supplement: supp [file elife-45248-supp-v1.zip › elife_poa_e45248_Figure_8_figure_supplement_1.tif]

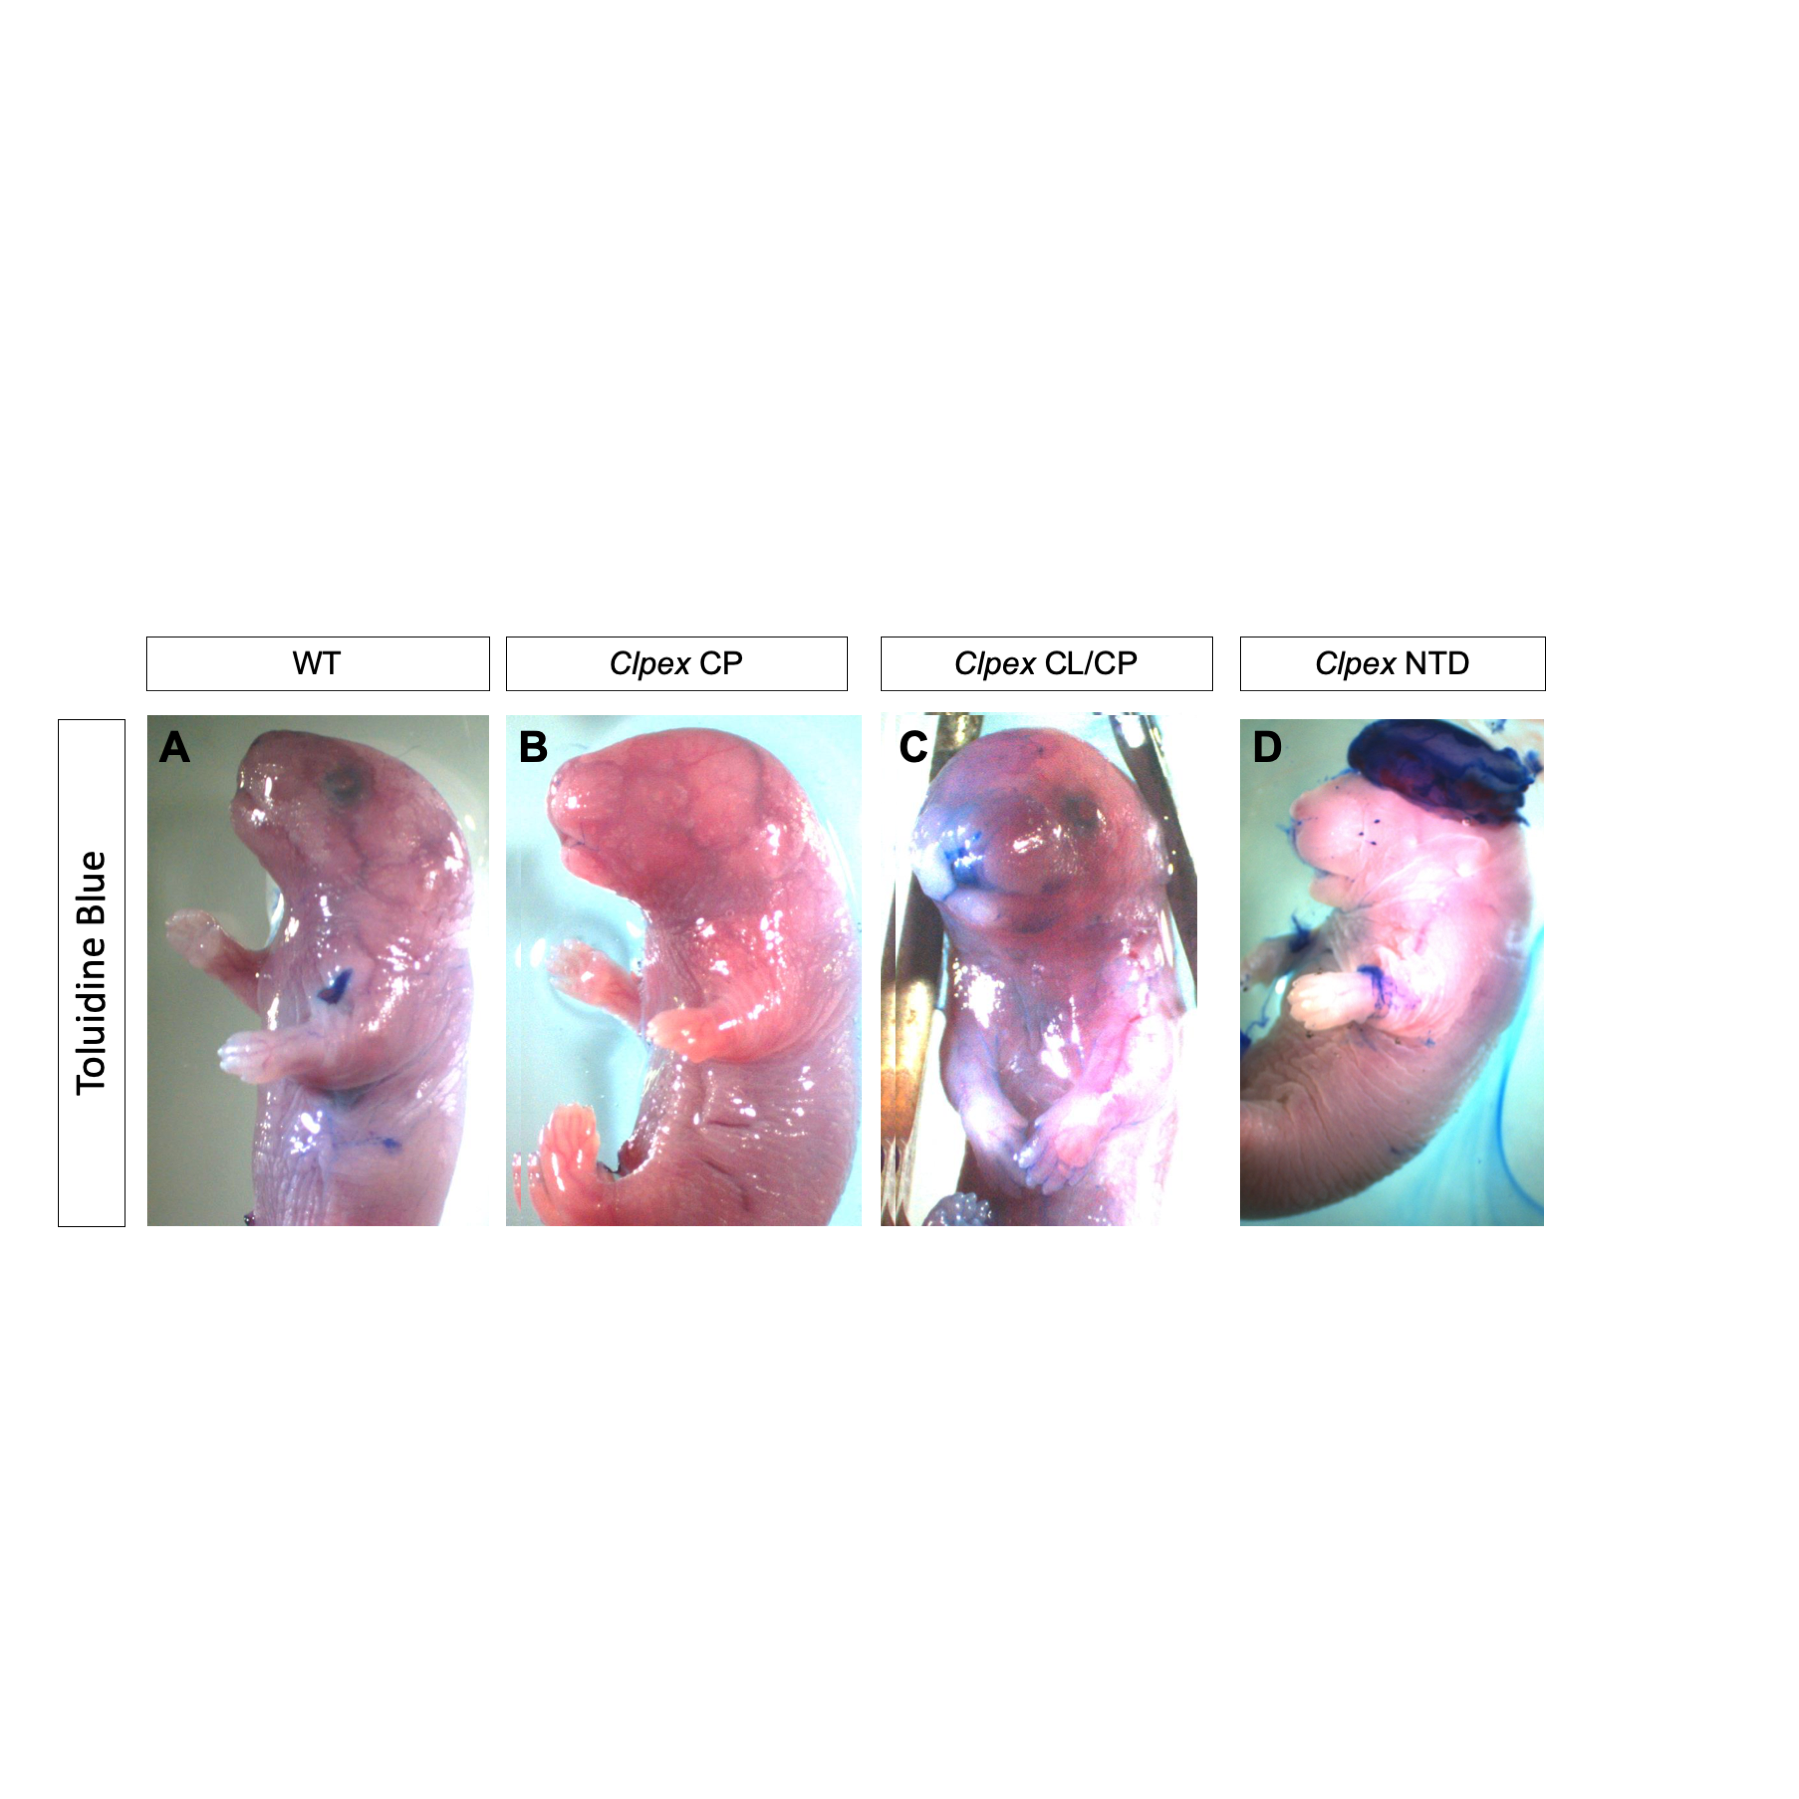

Supplement: supp [file elife-45248-supp-v1.zip › elife_poa_e45248_Figure_6_figure_supplement_1.tif]
